# Supplementary material for: PIN2 is required for the adaptation of Arabidopsis roots to alkaline stress by modulating proton secretion
Source: PubMed Central journal article supplement — J Exp Bot. 2012 Sep 21;63(17):6105–14. doi: 10.1093/jxb/ers259 (PMC3481202; doi:10.1093/jxb/ers259), 2012-09-21

## **PIN2 is required for the adaptation of Arabidopsis root to alkaline stress by modulating proton secretion**

**Weifeng Xu<sup>1,2,§</sup>, Liguo Jia<sup>3,§</sup>, František Baluška<sup>4</sup>, Guochang Ding<sup>3,5</sup>, Weiming Shi<sup>2,\*</sup>, Nenghui Ye<sup>3</sup> and Jianhua Zhang<sup>1,\*</sup>**

<sup>1</sup>School of Life Sciences and State Key Laboratory of Agrobiotechnology, The Chinese University of Hong Kong, Shatin, Hong Kong

<sup>2</sup>State Key Laboratory of Soil and Sustainable Agriculture, Institute of Soil Science, Chinese Academy of Sciences, Nanjing 210008, China

<sup>3</sup>Department of Biology, Hong Kong Baptist University, Hong Kong, China

<sup>4</sup>Institute of Cellular and Molecular Botany, University of Bonn, Kirschallee 1, 53115 Bonn, Germany

<sup>5</sup>College of Forestry, Fujian Agriculture and Forestry University, Fuzhou 350002, China

§ contribute equally to this paper

\* **Corresponding author:**

### **Supplementary Data**

Supplementary data are available at *JXB* online:

**Supplementary Table S1** Gene-specific primers used for PCR

| Gene                                               | Code      | Primer (5' to 3')                                                  |
|----------------------------------------------------|-----------|--------------------------------------------------------------------|
| primers specific to<br>the T-DNA of<br>Salk_108074 | LP        | CGCGTTTAAACTCTTCACAGC                                              |
|                                                    | RP        | ATCTTTTAAAAGCTTCCGCG                                               |
|                                                    | BP        | ATTTTGCCGATTTCGGAAC                                                |
| <i>At-ACT2</i>                                     | U41998    | [F]: ATTCAGATGCCCAGAAGTCTTGTTCC<br>[R]: ACCACCGATCCAGACACTGTACTTCC |
| <i>PKS5</i>                                        | NM_128589 | [F]: CAAGTTCCACGATGACGAGA<br>[R]: ATTCAACCGCGAAATACAAA             |
| <i>PIN2</i>                                        | NM_125091 | [F]: TTCCTCGCTGCTGATTCTC<br>[R]: CTATCTCCGCATCGGTCTG               |

**Supplementary Fig.S1** The gene expression of *PKS5* or *PIN2* in the wild-type Arabidopsis plant (WT) or the double mutant (*pks5/pin2*). The expression of *PKS5* or *PIN2* in WT was taken as 1-fold.

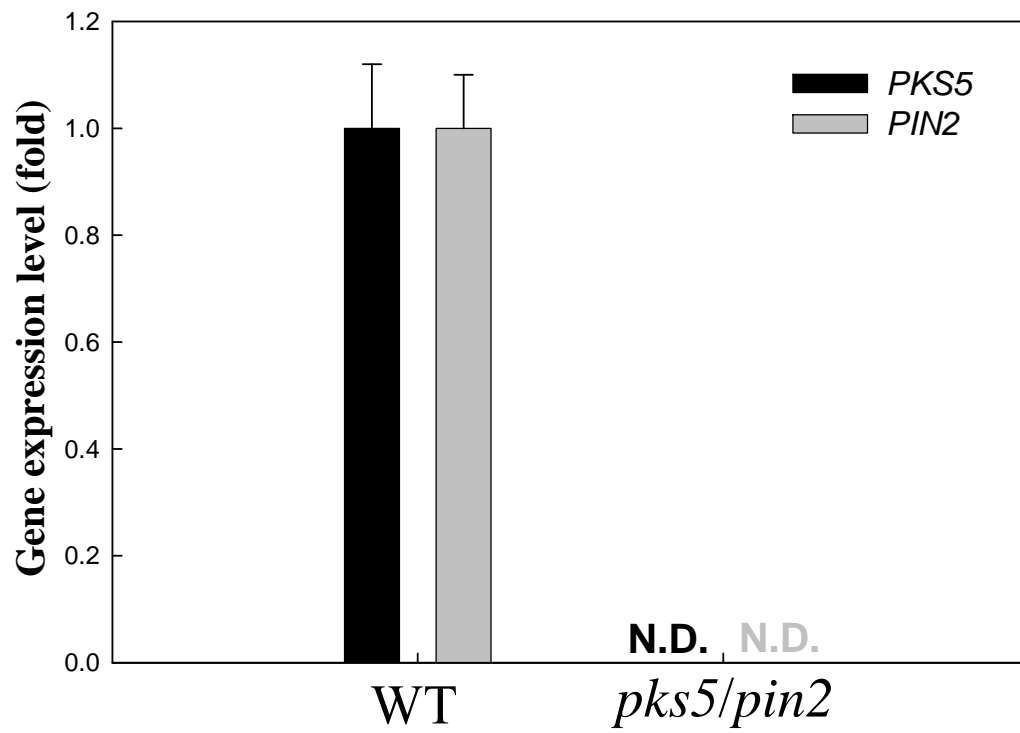

**Supplementary Fig.S2** Specific activities of plasma membrane and microsome vesicles isolated from Arabidopsis root.

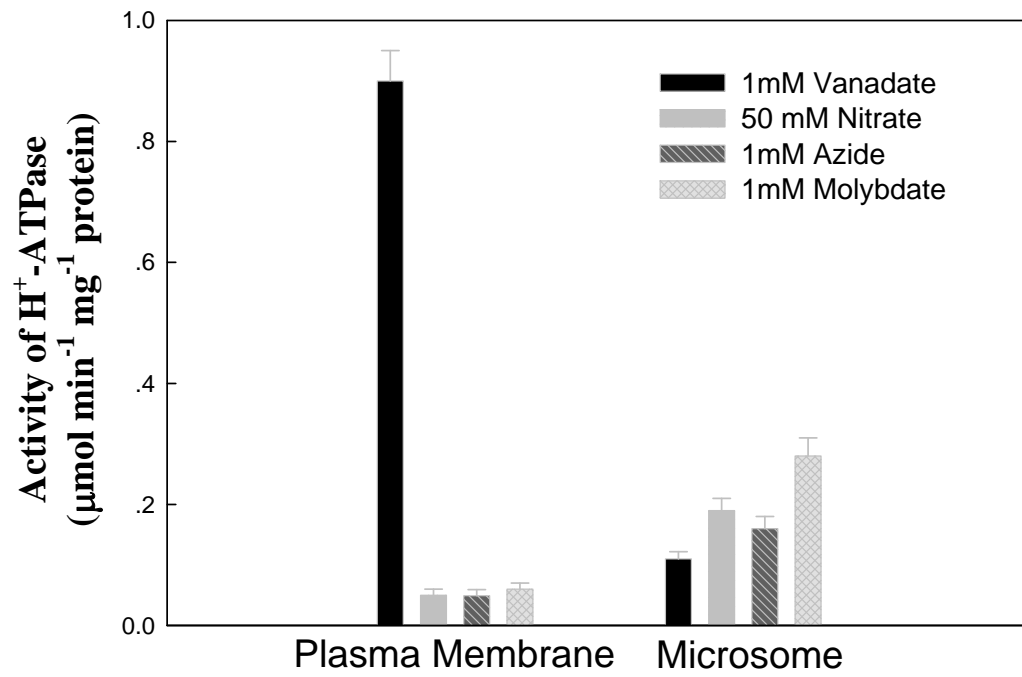

**Supplementary Fig.S3** Auxin distribution and abundance in the root tip of *pin2* mutant Arabidopsis plants (*pin2*) (DR5rev:GFP/*pin2*) under alkaline stress for 12h. 15-d-old Arabidopsis plants were treated with control condition (pH 5.8) (a) and alkaline stress (pH 8.0) for 12h (b) under hydroponic system. White arrowheads indicated no GFP expression. Bar = 100  $\mu$ m (blue line).

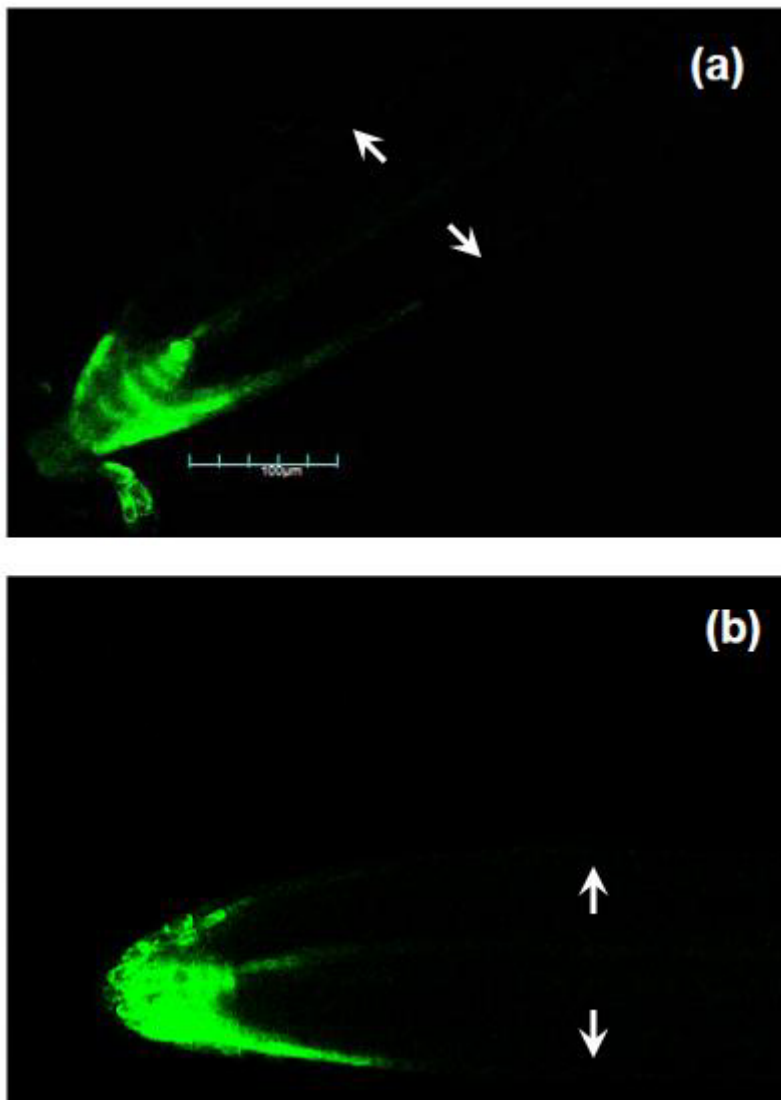

**Supplementary Fig.S4** Auxin abundance and basipetal auxin transport in the root tip of wild-type Arabidopsis plants (WT) (DR5rev:GFP) or *pin2* mutant Arabidopsis plants (*pin2*) (DR5rev:GFP/*pin2*) under alkaline stress for 12h. (a) “GFP fluorescence in the root tip (0-200  $\mu\text{m}$  from root cap junction) of WT (DR5rev:GFP) under control condition” are plotted as “100%”. (b) Relative auxin transport (basipetal auxin transport) was studied using DR5rev:GFP-based assay, and “GFP fluorescence the epidermal cells of root tip (200 - 520  $\mu\text{m}$  from root cap junction) in WT (DR5rev:GFP) under control condition” are plotted as “100%”.

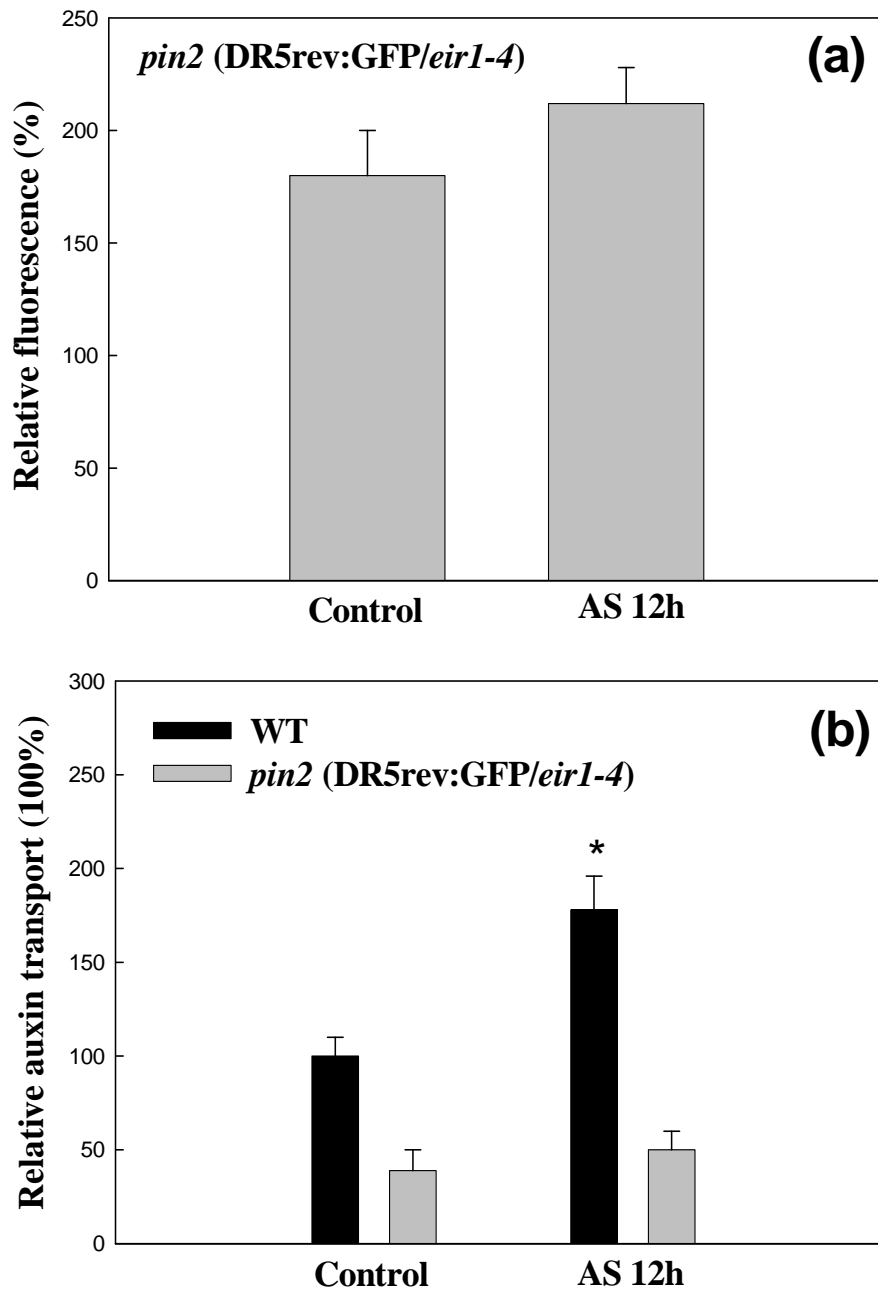

**Supplementary Fig.S5** The correlation between *PIN2* transcript abundance and proton flux or primary root elongation in different *Arabidopsis* natural accessions

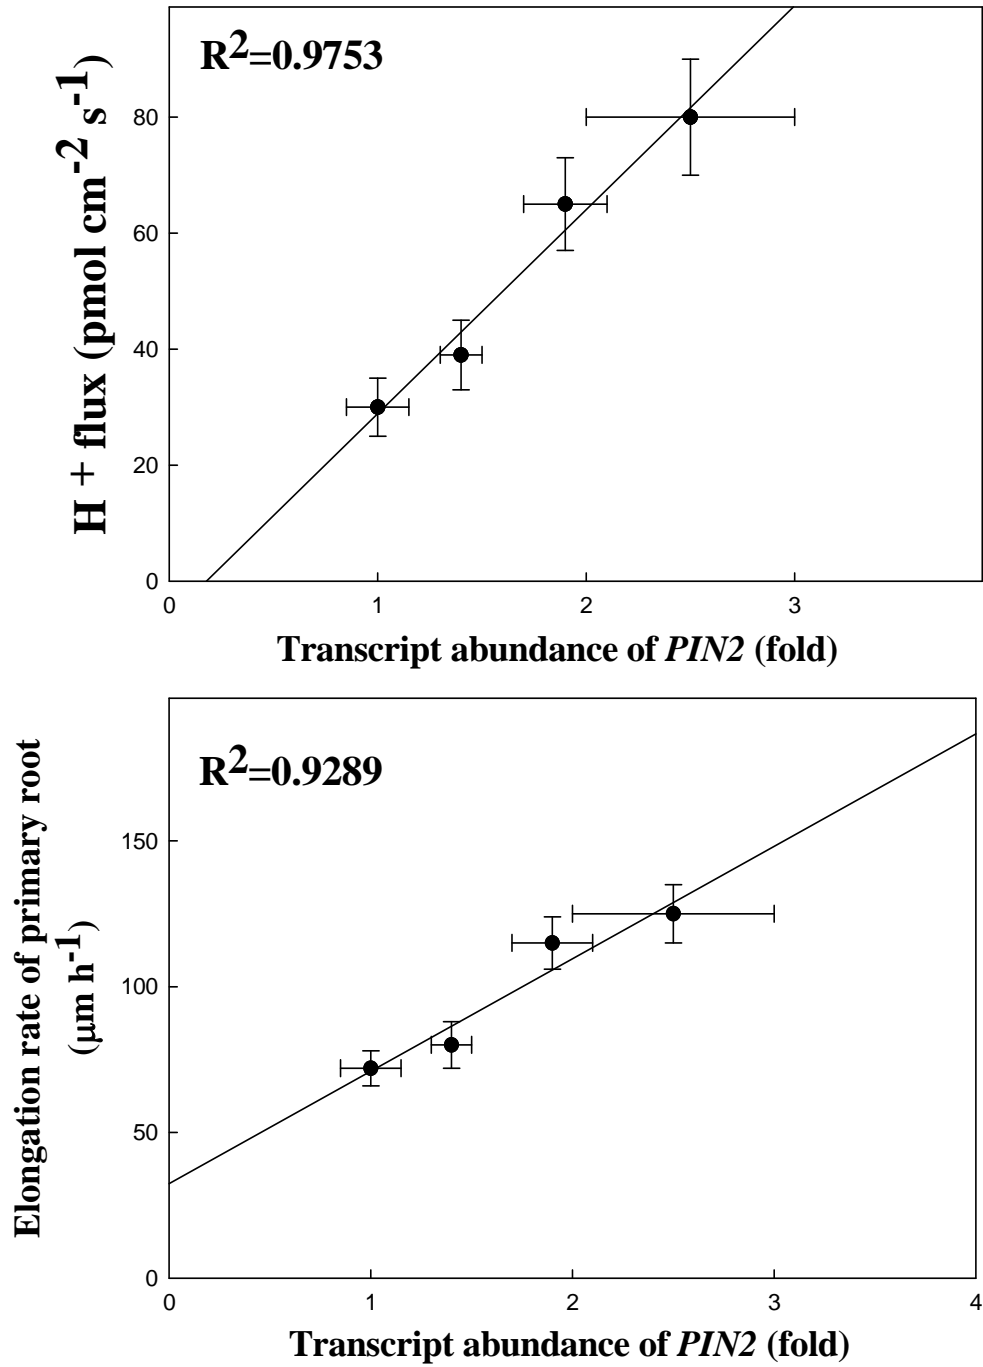

Supplement: supp_ers259_jexbot080994_file001.pdf [file supp_ers259_jexbot080994_file001.pdf]
